# Supplementary material for: Effect of Contact Area and Shape of Anode Current Collectors on Bacterial Community Structure in Microbial Fuel Cells
Source: MDPI journal article supplement (doi:10.3390/molecules27072245), 2022-03-30
Supplement: s1 [file s1]

# Supplementary Materials

## Effect of Contact Area and Shape of Anode Current Collectors on Bacterial Community Structure in Microbial Fuel Cells

Agathe Paitier <sup>1,2</sup>, Naoufel Haddour <sup>1,\*</sup>, Chantal Gondran <sup>3</sup> and Timothy M. Vogel <sup>2</sup>

<sup>1</sup> Laboratoire Ampère, Université de Lyon, Ecole Centrale de Lyon, CNRS, UMR 5005, 36 Avenue Guy de Collongue, 69134 Ecully, France; [naoufel.haddour@ec-lyon.fr](mailto:naoufel.haddour@ec-lyon.fr)

<sup>2</sup> Environmental Microbial Genomics, Laboratoire Ampère, Université de Lyon, Université Claude Bernard Lyon 1, CNRS, UMR 5005, 43 Boulevard du 11 Novembre 1918, CEDEX, 69616 Villeurbanne, France; [vogel@univ-lyon1.fr](mailto:vogel@univ-lyon1.fr)

<sup>3</sup> DCM, Université Grenoble Alpes, CNRS, Grenoble F-38000, France; [chantal.gondran@univ-grenoble-alpes.fr](mailto:chantal.gondran@univ-grenoble-alpes.fr)

\* Correspondence: [naoufel.haddour@ec-lyon.fr](mailto:naoufel.haddour@ec-lyon.fr) (N.H.); Tel. : +33-4-72-18-61-12 (N.H)

**Figure S1.** Maximal power output for each current collector configuration.

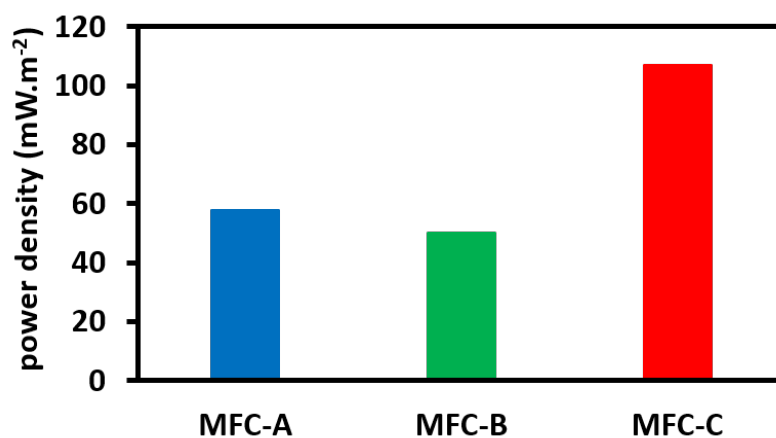

**Table S1.** Composition of synthetic wastewater for 500mg COD/L.

| Compounds dissolved in tap water                                            | Mass for 1L of solution (mg) |
|-----------------------------------------------------------------------------|------------------------------|
| tryptone                                                                    | 800                          |
| yeast extract                                                               | 550                          |
| urea (CH <sub>4</sub> N <sub>2</sub> O)                                     | 150                          |
| anhydrous dipotassium hydrogen phosphate (K <sub>2</sub> HPO <sub>4</sub> ) | 140                          |
| sodium chloride (NaCl)                                                      | 35                           |
| calcium chloride dihydrate (CaCl <sub>2</sub> .2H <sub>2</sub> O)           | 20                           |
| magnesium sulphate heptahydrate (MgSO <sub>4</sub> .7H <sub>2</sub> O)      | 10                           |

**Table S2. Primer sequences for qPCR assay of “all bacteria” and for *Geobacter* sp. and for sequencing of the variable V3 and V4 regions of the 16S rRNA gene.**

| Assay                                   | Names and sequences (5'-3')                                                                                                                                                                 | Product size (bp) | Annealing temperature (°C) | Reference                               |
|-----------------------------------------|---------------------------------------------------------------------------------------------------------------------------------------------------------------------------------------------|-------------------|----------------------------|-----------------------------------------|
| “all bacteria”                          | <b>Eub338F</b> ; ACT CCT ACG<br>GGA GGC AGC AG<br><b>Eub518R</b> ; ATT ACC GCG<br>GCT GCT GG                                                                                                | 200               | 53                         | Fierer <i>et al.</i> <sup>1</sup>       |
| <i>Geobacter</i> sp.                    | <b>Geo561F</b> ; GCG TGT AGG<br>CGG TTT CTT AA<br><b>Geo825R</b> ; TAC CCG CRA<br>CAC CTA GTT CT                                                                                            | 265               | 59                         | Stults <i>et al.</i> <sup>2</sup>       |
| Primers for 16S<br>V3 and V4<br>regions | <b>Fwd</b> ; TCG TCG GCA GCG<br>TCA GAT GTG TAT AAG<br>AGA CAG CCT ACG GGN<br>GGC WGC AG<br><b>Rev</b> ; GTC TCG TGG GCT<br>CGG AGA TGT GTA TAA<br>GAG ACA GGA CTA CHV<br>GGG TAT CTA ATC C | 460               | 55                         | Illumina’s<br>instructions <sup>3</sup> |
